# Supplementary material for: Adjusting the charging behavior of TiO2 with basic surfactants in an apolar medium for electrophoretic displays
Source: Royal Society of Chemistry journal article supplement (doi:10.1039/d4na00301b), 2024-01-01
Supplement: d4na00301b2.pdf [file d4na00301b2.pdf]

## Supporting Information

### **Adjusting the charging behavior of TiO<sub>2</sub> with basic surfactants in an apolar medium for electrophoretic display**

Yanfang Yu <sup>ab</sup>, Hongli Liu <sup>ab</sup>, Yinzhao Zhen <sup>ab</sup>, Ye Liu <sup>ab</sup> Bonan Gao <sup>ab</sup> Xianggao Li <sup>ab</sup>,  
and Shirong Wang <sup>ab\*</sup>

<sup>a</sup>School of Chemical Engineering and Technology, Tianjin University, Tianjin, 300072, China.

<sup>b</sup>Collaborative Innovation Center of Chemical Science and Engineering, Tianjin, 300072, China.

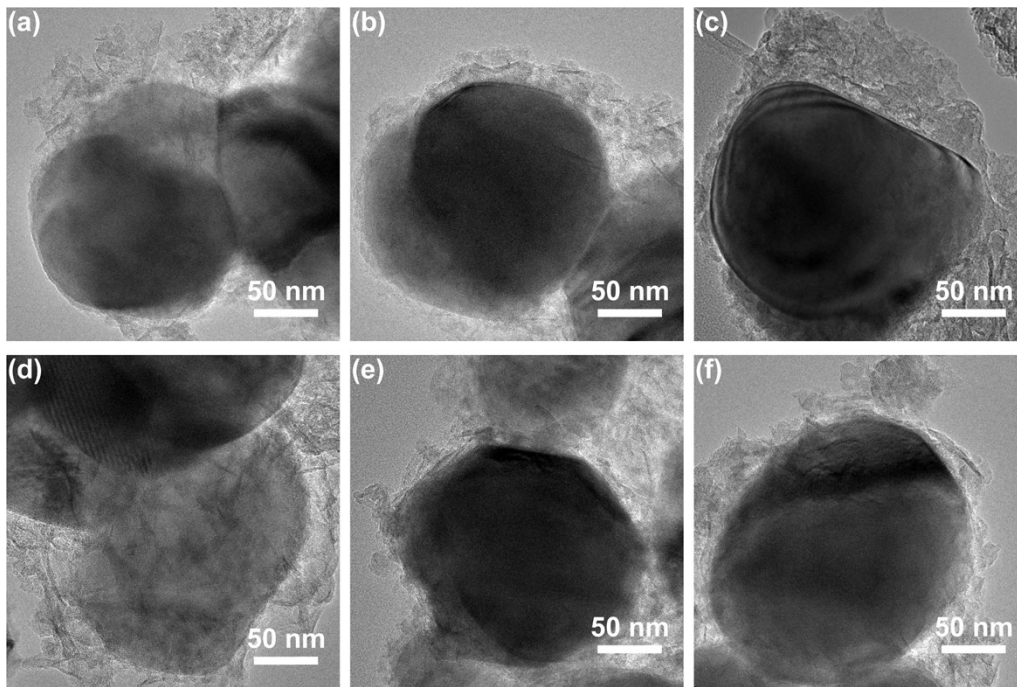

Fig. S1 TEM images of (a) raw  $\text{TiO}_2$  and  $\text{TiO}_2$  after modified with (b) T161, (c) T151, (d) T154, (e) S17000 and (f) S24000.

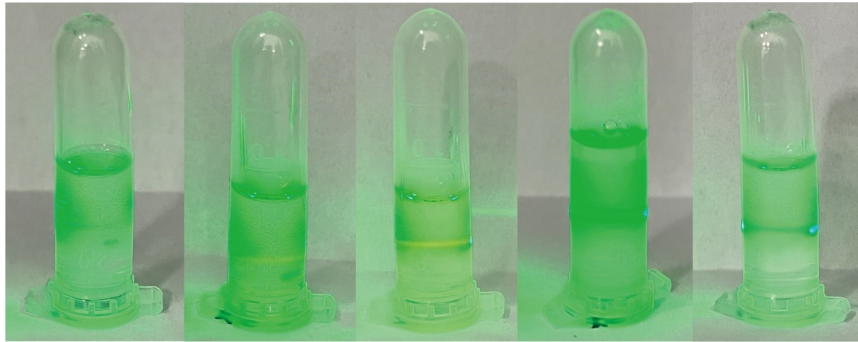

Fig. S2 The optical path under laser irradiation of T161, T151, T154, S17000 and S24000 in Isopar L.

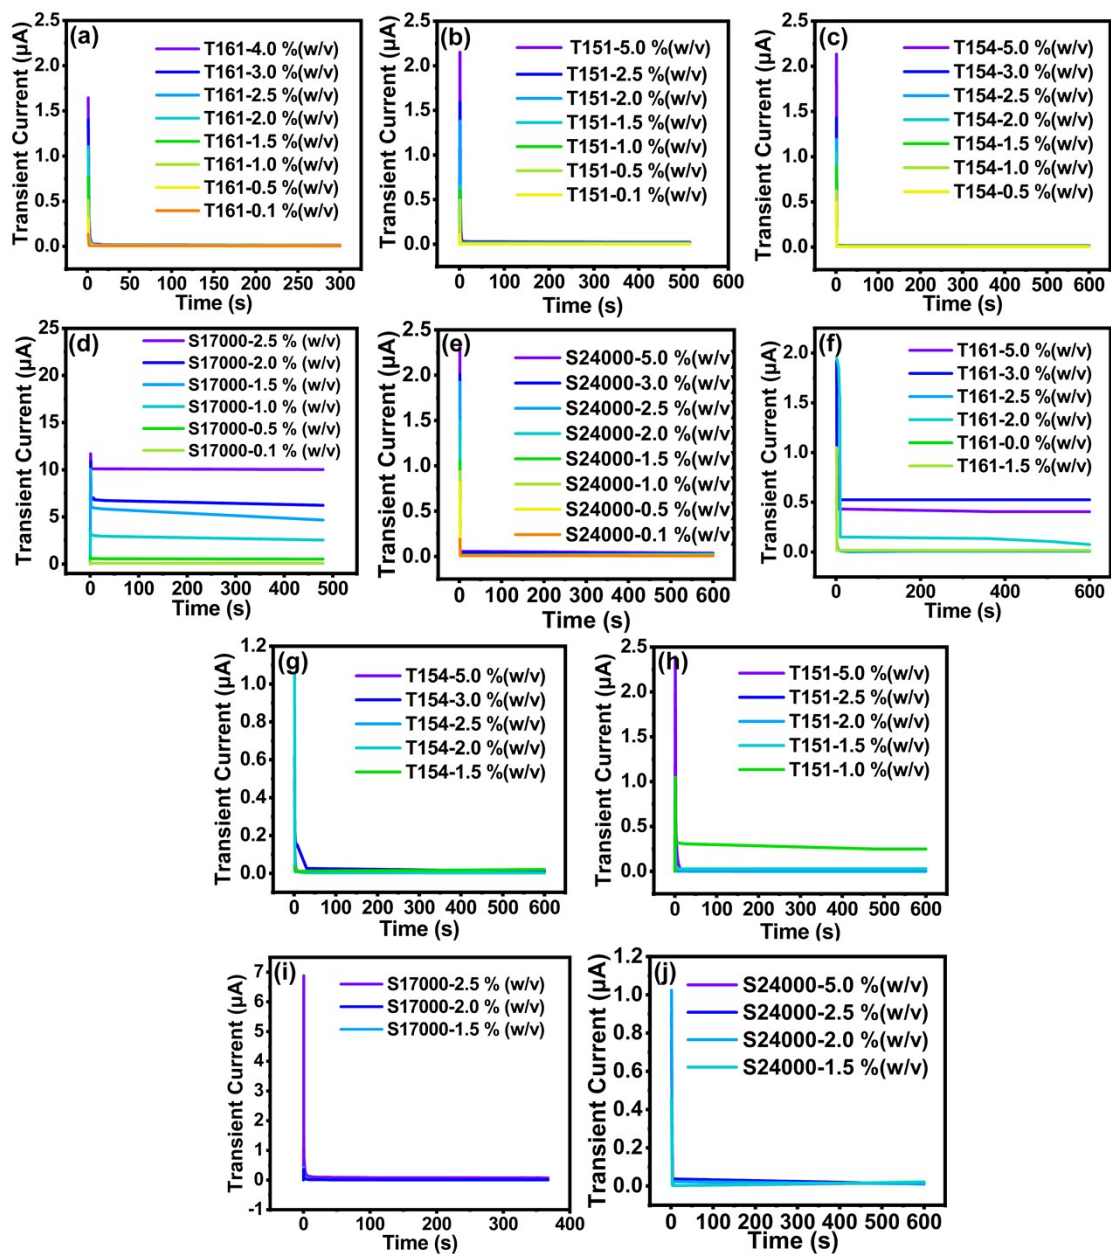

Fig. S3 Transient current diagram of (a)~(e) non-particle dispersions and (f) ~ (j)  $\text{TiO}_2$  particle dispersions with different concentrations of surfactants.

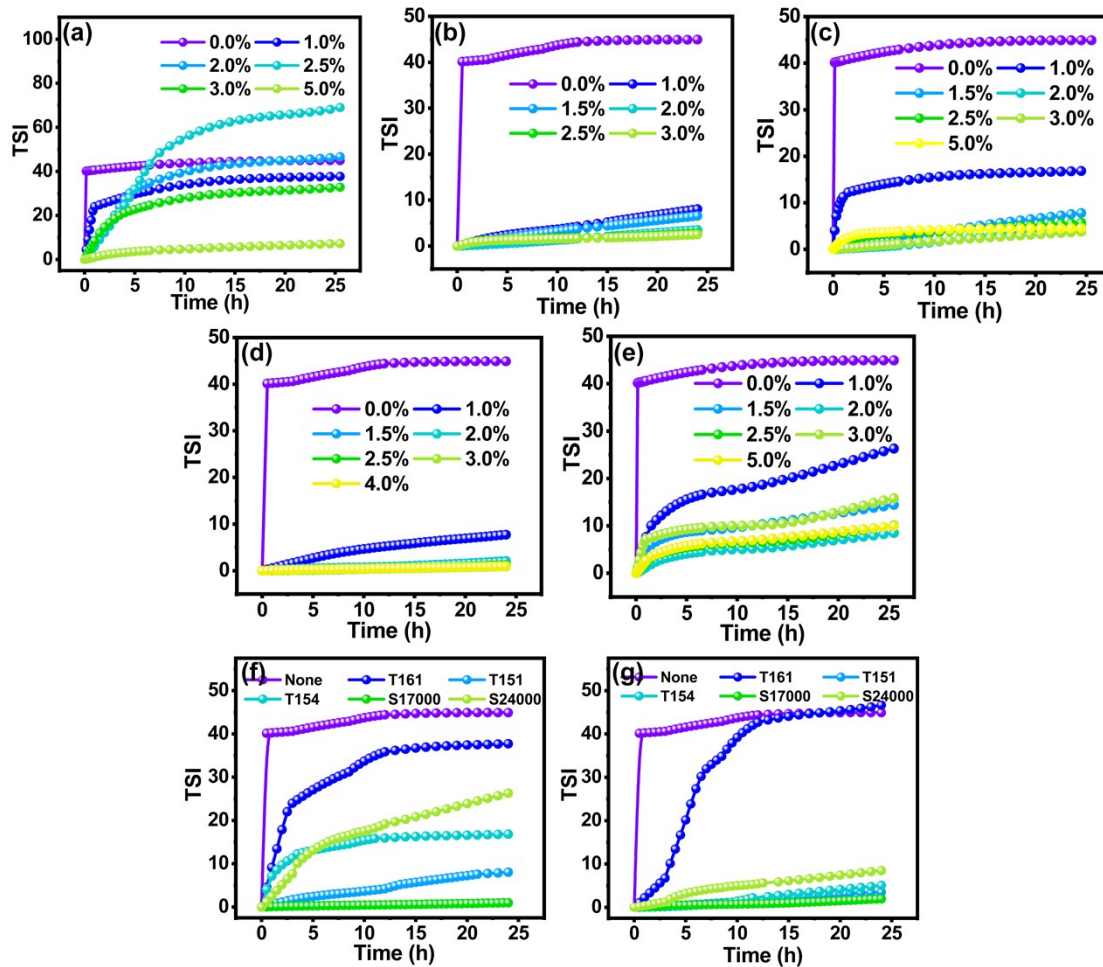

Fig. S4 The change diagram of TSI of  $\text{TiO}_2$  modified with (a) T161, (b) T151, (c) T154, (d) S17000 and (e) S24000. The Change diagram of TSI (f) with the same concentration of anchoring groups and (g) with the same concentration of solvated chain.

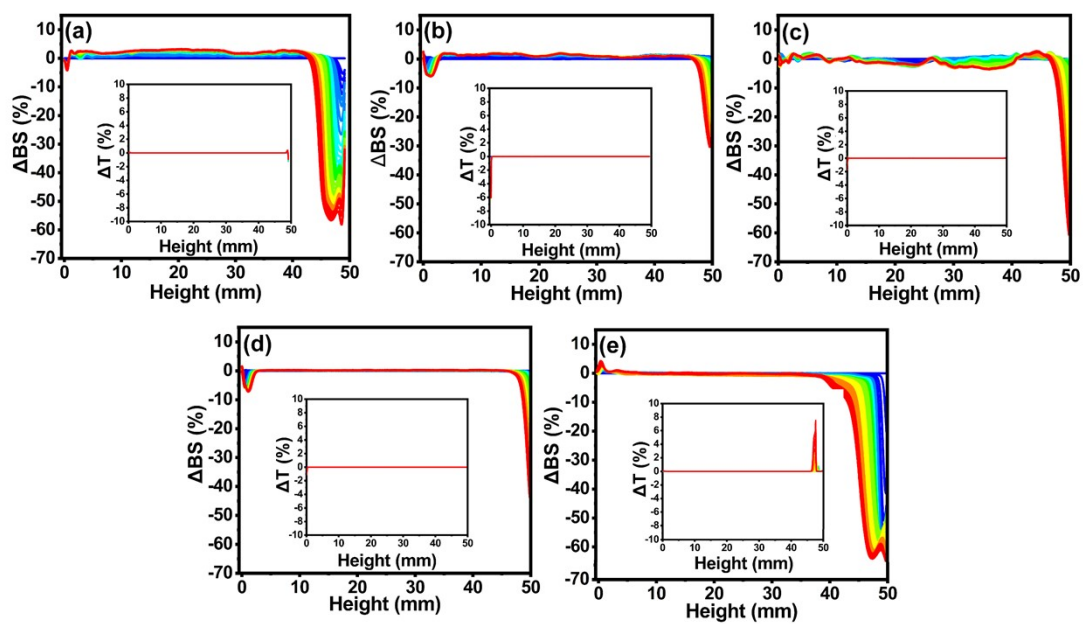

Fig. S5 The change of the backscattering and transmitting light of TiO<sub>2</sub> modified with (a) T161, (b) T151, (c) T154, (d) S17000 and (e) S24000.

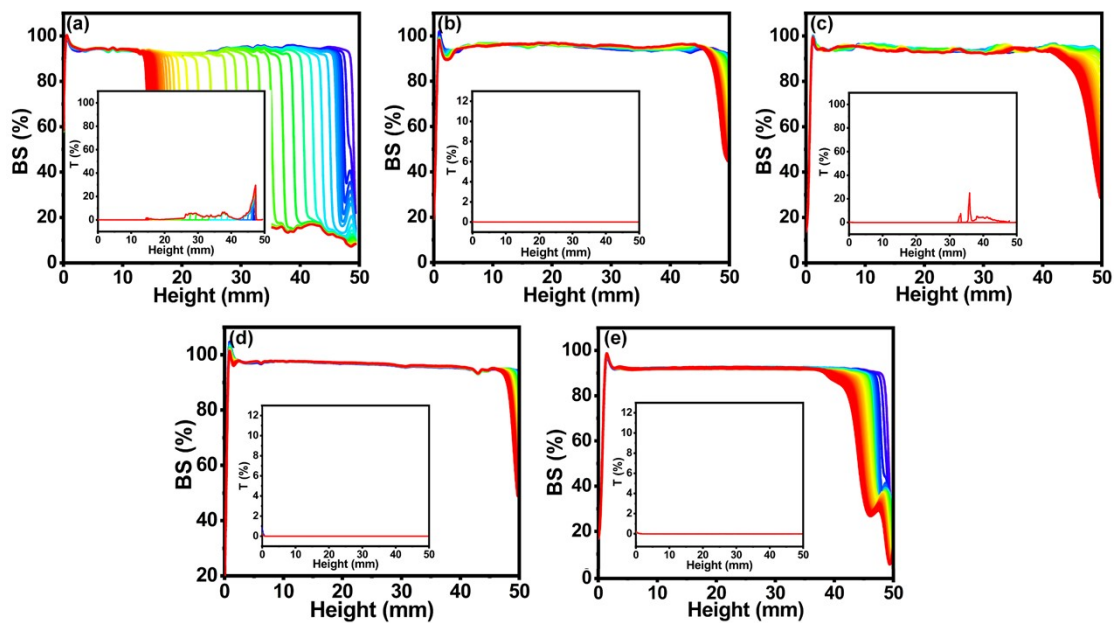

Fig. S6 The values of the backscattering and transmitting light of  $\text{TiO}_2$  modified with (a) T161, (b) T151, (c) T154, (d) S17000 and (e) S24000 with the same concentration of solvation chain for every surfactant.

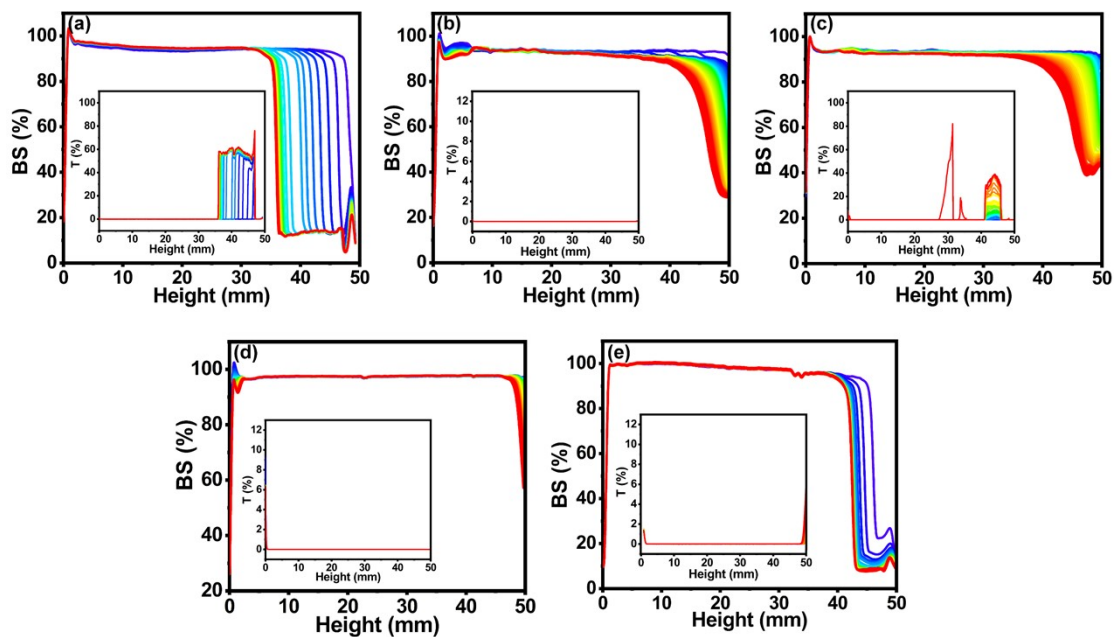

Fig. S7 The values of the backscattering and transmitting light of  $\text{TiO}_2$  modified with (a) T161, (b) T151, (c) T154, (d) S17000 and (e) S24000 with the same concentration of anchoring groups for every surfactant.



Table S1 The comparison of the response time of EPDs consisting of electrophoretic particles with different modification methods

| No. | White/Black or Colored Particles-Additives                                  | Solvent                         | Response Time (ms) |
|-----|-----------------------------------------------------------------------------|---------------------------------|--------------------|
| 1   | TiO <sub>2</sub> /FeMn Black<br>-Solsperse 17000/AFK 3777 (this work)       | Isopar L                        | 166.7              |
| 2   | TiO <sub>2</sub> /Copper Chromite Black<br>-OLOA 5470 <sup>1</sup>          | Isopar G                        | 176.6              |
| 3   | TiO <sub>2</sub> /FeMn Black<br>-OLOA 11000/SiO <sub>2</sub> <sup>2</sup>   | Isopar G                        | 187.0              |
| 4   | TiO <sub>2</sub> /Carbon Black<br>-Span 80/OLOA 1200 <sup>3</sup>           | C <sub>2</sub> Cl <sub>4</sub>  | 240.0              |
| 5   | TiO <sub>2</sub> /FeMn Black<br>-CCA/LC <sup>4</sup>                        | Nonpolar solvent                | 320.0              |
| 6   | TiO <sub>2</sub> /FeMn Black<br>-CCA <sup>5</sup>                           | /                               | 480.0              |
| 7   | TiO <sub>2</sub> /Carbon Black<br>-CCA <sup>6</sup>                         | /                               | 500.0              |
| 8   | TiO <sub>2</sub> /Fe <sub>3</sub> O <sub>4</sub><br>-OLOA 1200 <sup>7</sup> | C <sub>2</sub> Cl <sub>4</sub>  | 2000.0             |
| 9   | TiO <sub>2</sub> /Organic Pigment<br>-Span 85 <sup>8</sup>                  | C <sub>2</sub> HCl <sub>3</sub> | 3000.0             |
| 10  | TiO <sub>2</sub> /Copper Phthalocyanine<br>-Span 80 <sup>9</sup>            | C <sub>2</sub> Cl <sub>4</sub>  | 5000.0             |

## References

- 1 J. Hong, M. Lai, J. Chen, L. Zhou, T. Sun, B. Ma, Y. Chen, X. Zeng and M. Wu, *Chemical Engineering Journal*, 2022, **439**, 135726.
- 2 M. Yang, G. Liu, Z. Zeng, S. Zhang, J. Liu, Z. Qin, Z. Chen and B. Yang, *Adv Materials Technologies*, 2022, 2200371.
- 3 K. U. Lee, M. J. Kim, K. J. Park, M. Kim and J. J. Kim, *Dyes and Pigments*, 2015, **121**, 276–281.
- 4 Y.-D. Zhang, W.-J. Hu, Z.-G. Qiu, J.-Z. Xu, M.-Y. Yang, Y.-F. Gu, J.-X. Cao, P. Chen, G.-S. Liu and B.-R. Yang, *Sci Rep*, 2019, **9**, 13981.
- 5 W. He, Z. Yi, S. Shen, Z. Huang, L. Liu, T. Zhang, W. Li, L. Wang, L. Shui, C.

- Zhang and G. Zhou, *Micromachines*, 2020, **11**, 498.
- 6J. Y. Kim, J.-Y. Oh and K.-S. Suh, *Carbon*, 2014, **66**, 361–368.
- 7S. Liu, G. Wu, H.-Z. Chen and M. Wang, *Synthetic Metals*, 2012, **162**, 89–94.
- 8P. Yin, G. Wu, W. Qin, X. Chen, M. Wang and H. Chen, *Journal of Materials Chemistry C*, 2013, **1**, 843–849.
- 9Y. Wang, Z. Zhang, Q. Chen, C. Ye, J. Zhang, Q. Gao, L. Liu, J. Yang, X. Pan, Y. Miao, F. Chi and M. Jin, *Micromachines*, 2022, **13**, 880.
